# Supplementary material for: Dihydrotanshinone I inhibits hepatocellular carcinoma cells proliferation through DNA damage and EGFR pathway
Source: PeerJ journal article supplement (doi:10.7717/peerj.15022), 2023-03-13

MTT results

Huh-7


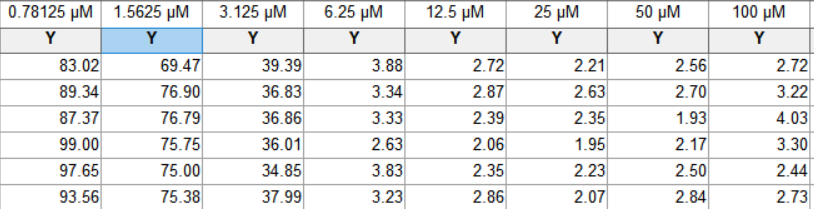


HepG2


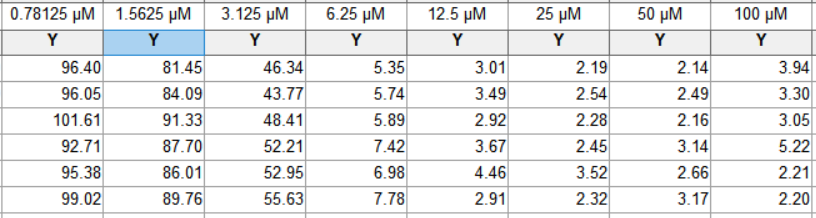


MIHA


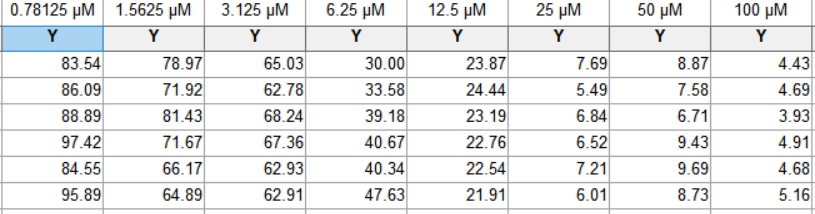


Colony formation results

Huh-7


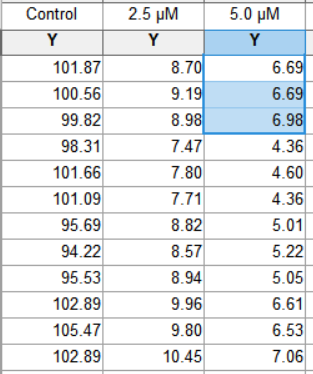


HePG2


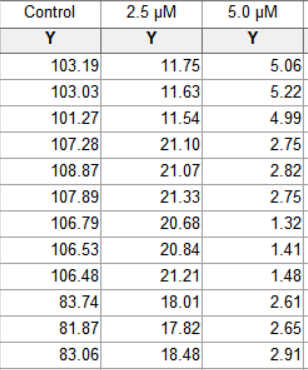


IF

Huh-7


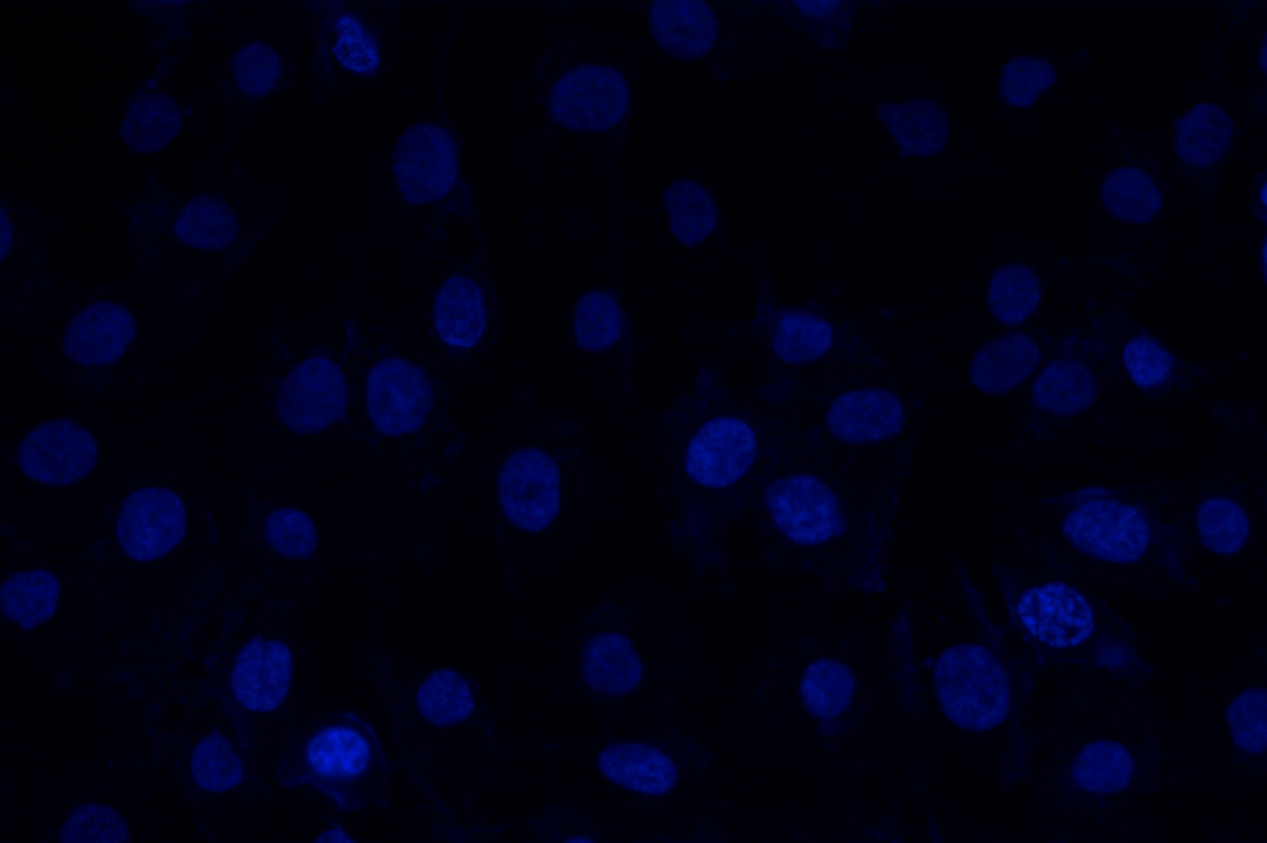


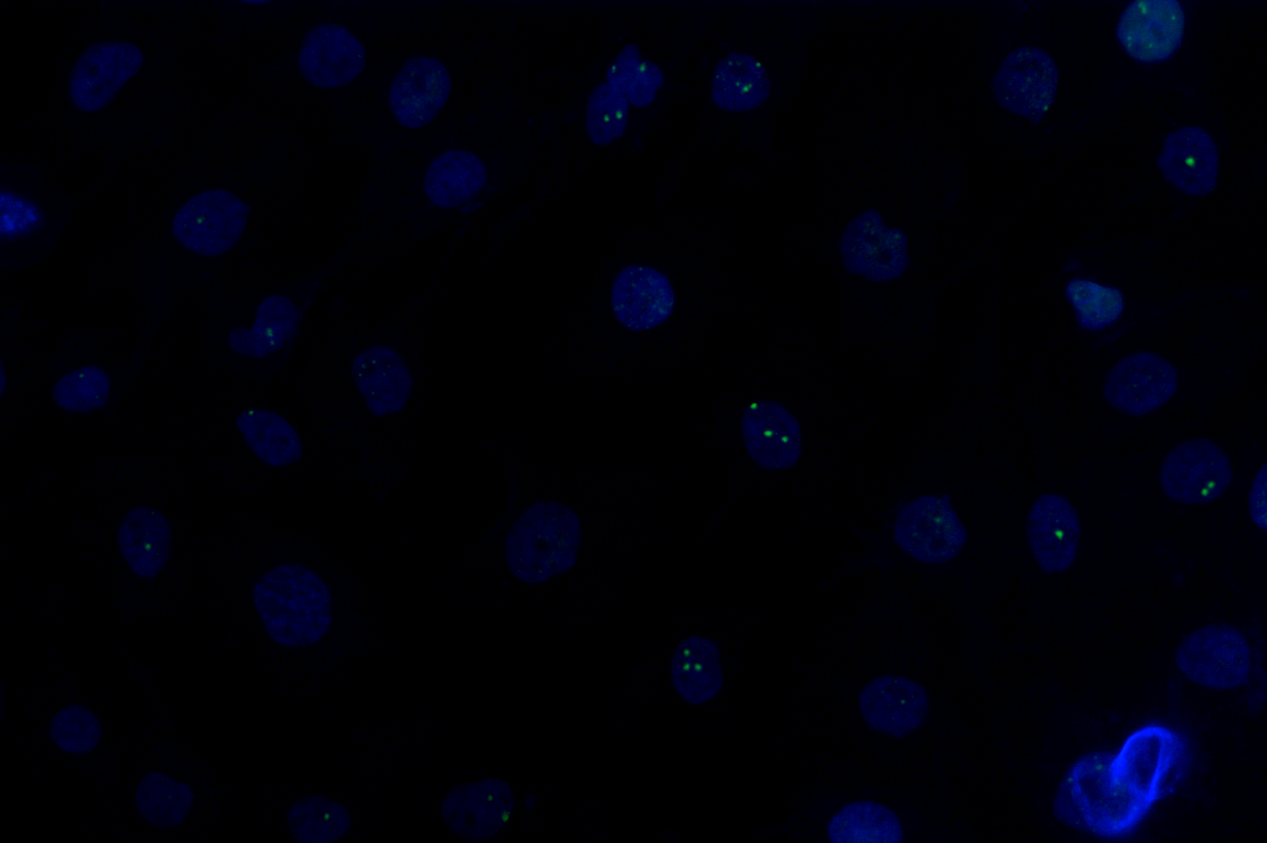


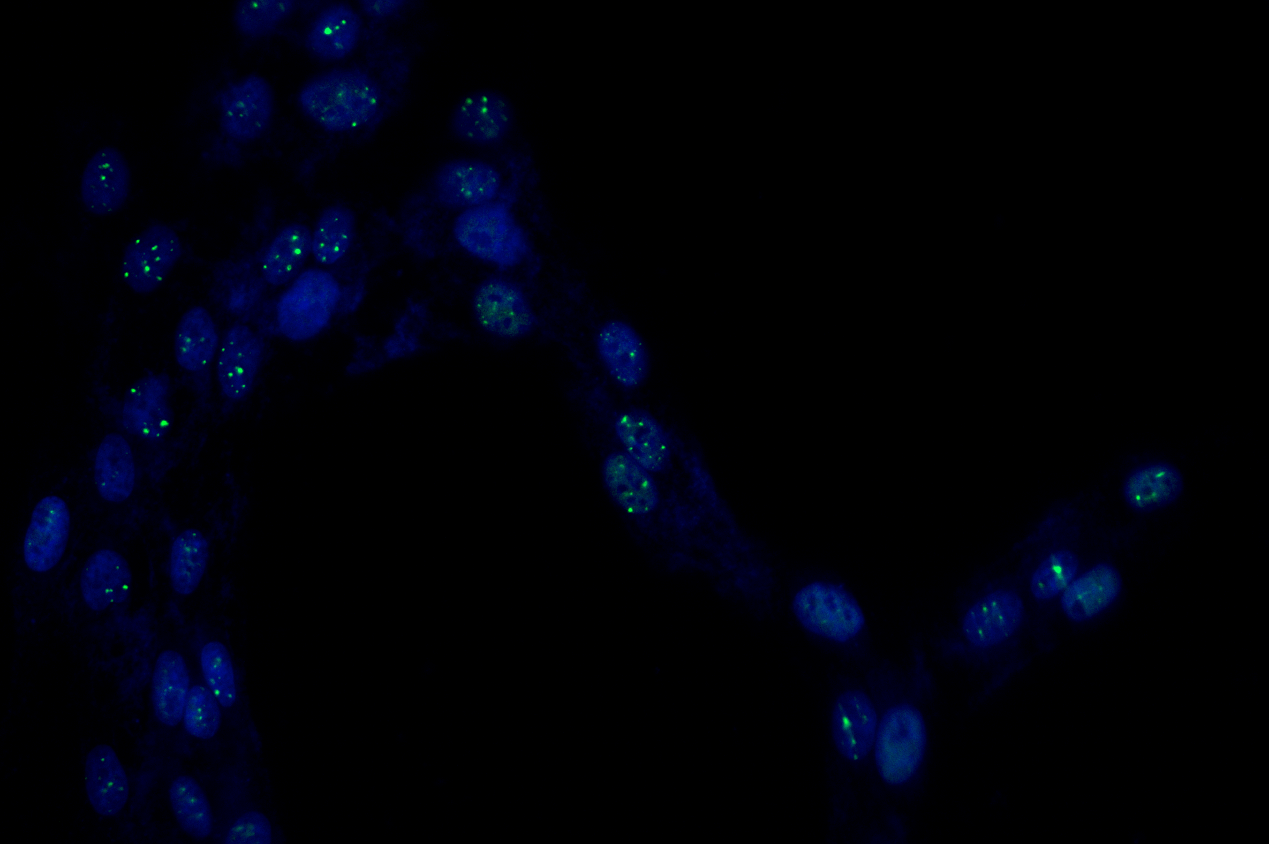


HepG2


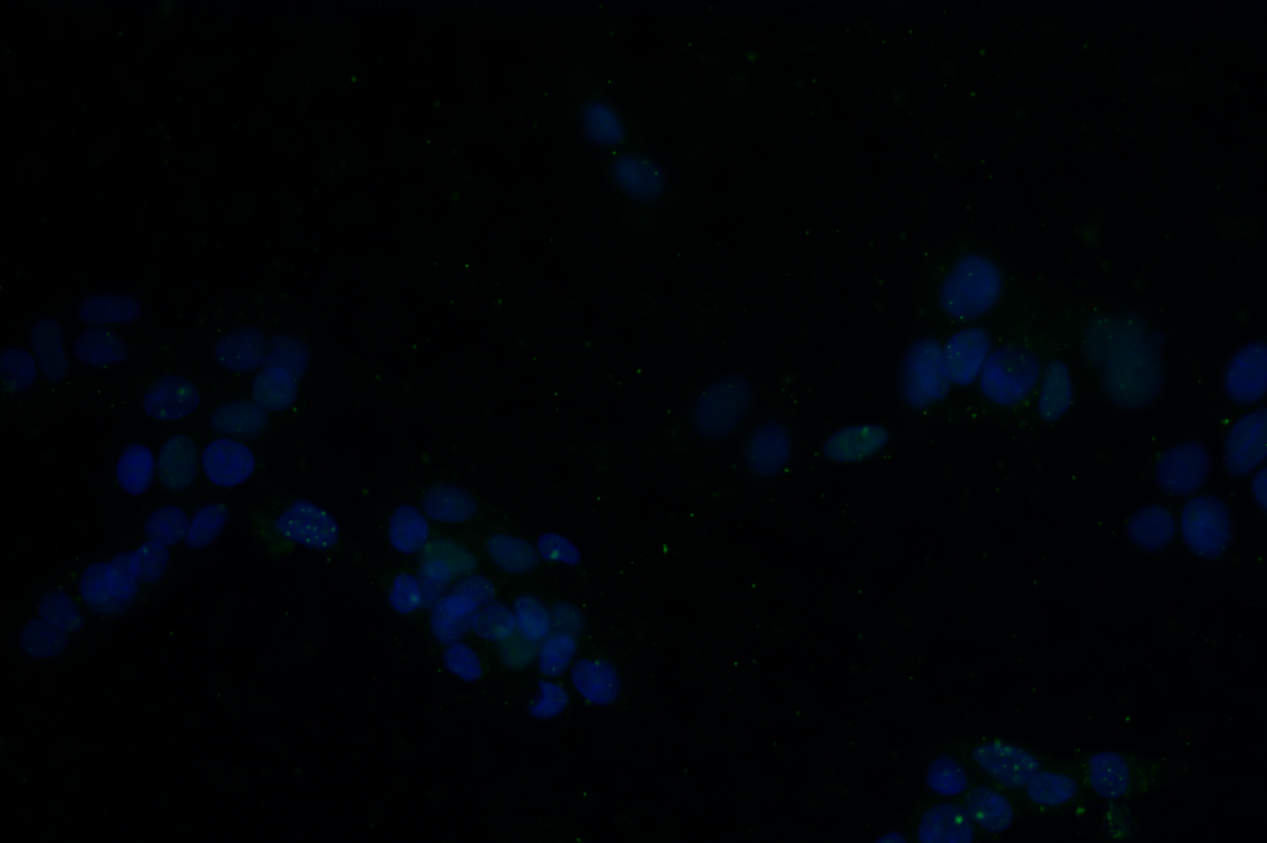


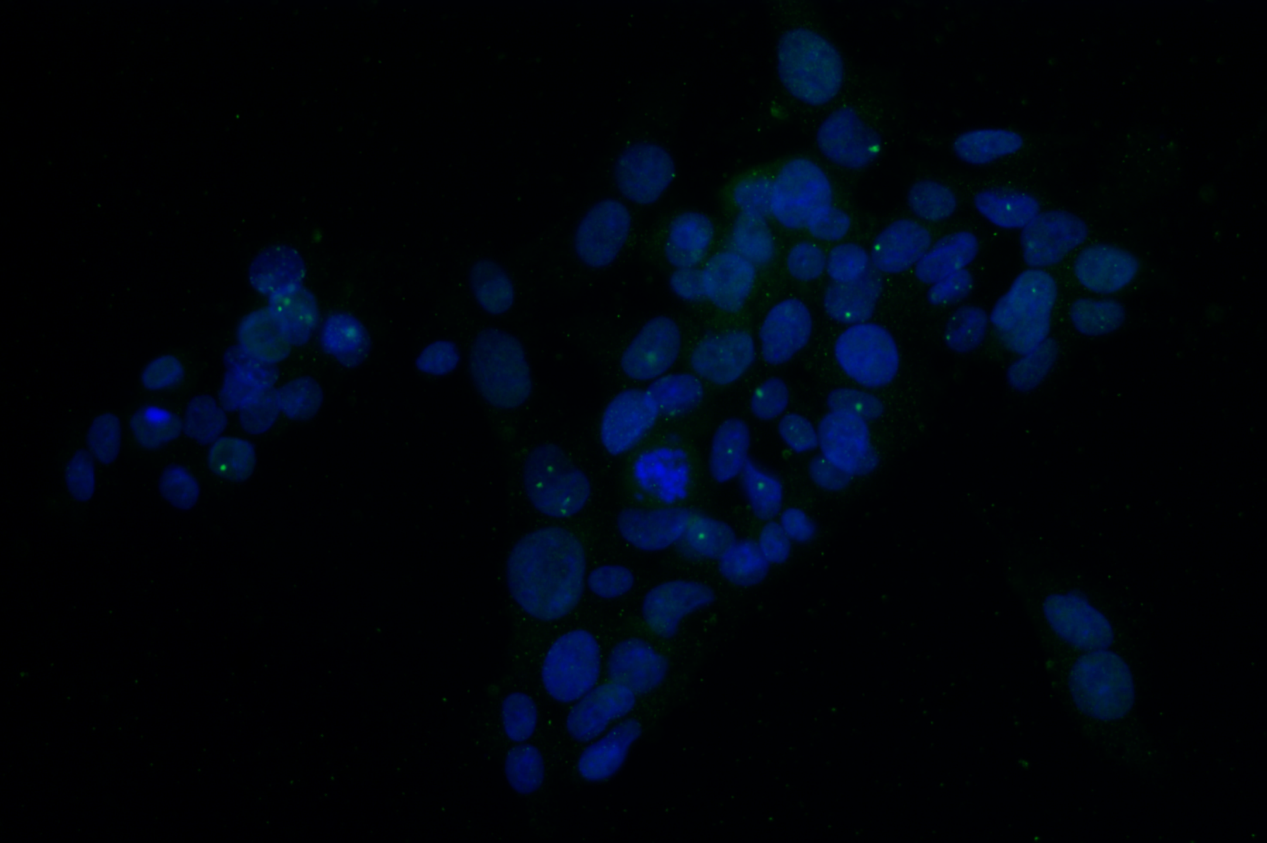


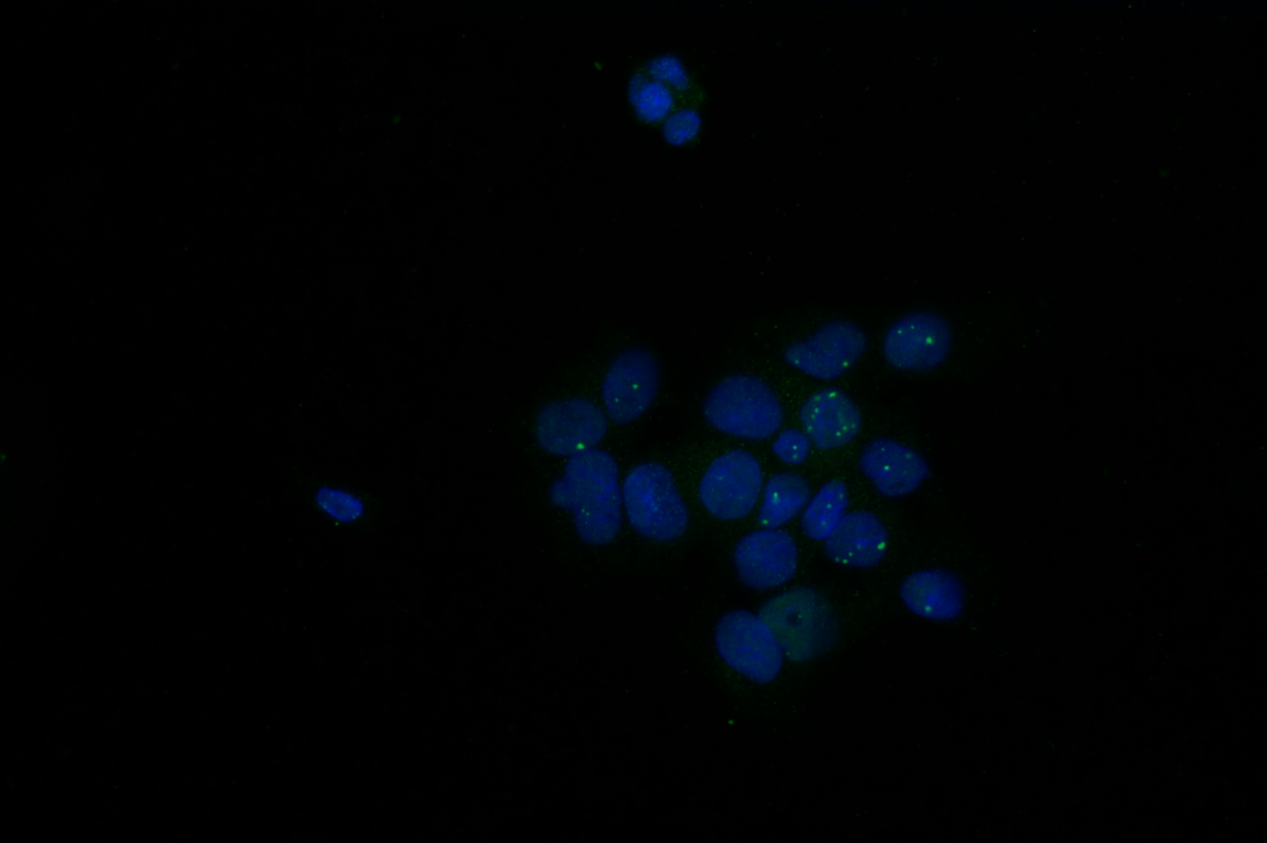


DAPI staining

Huh-7


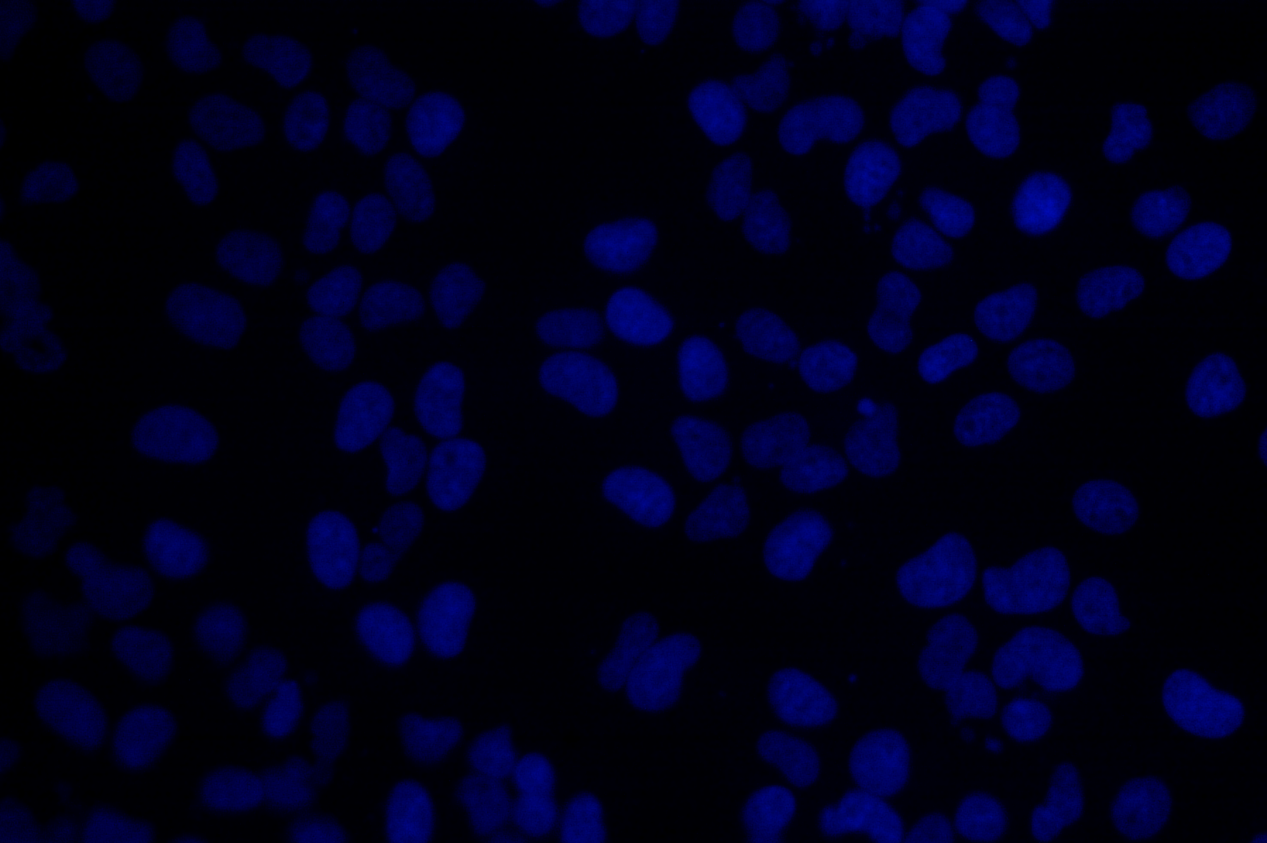


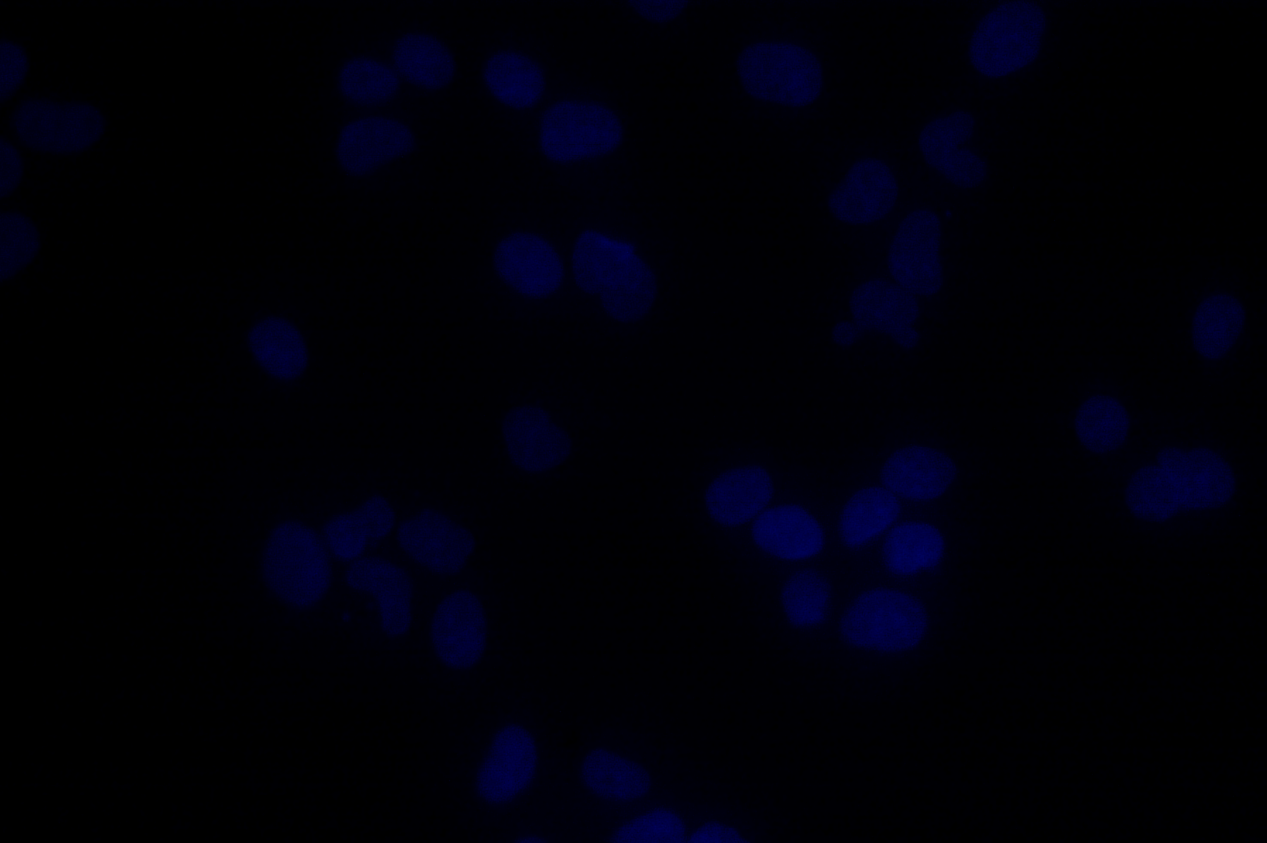


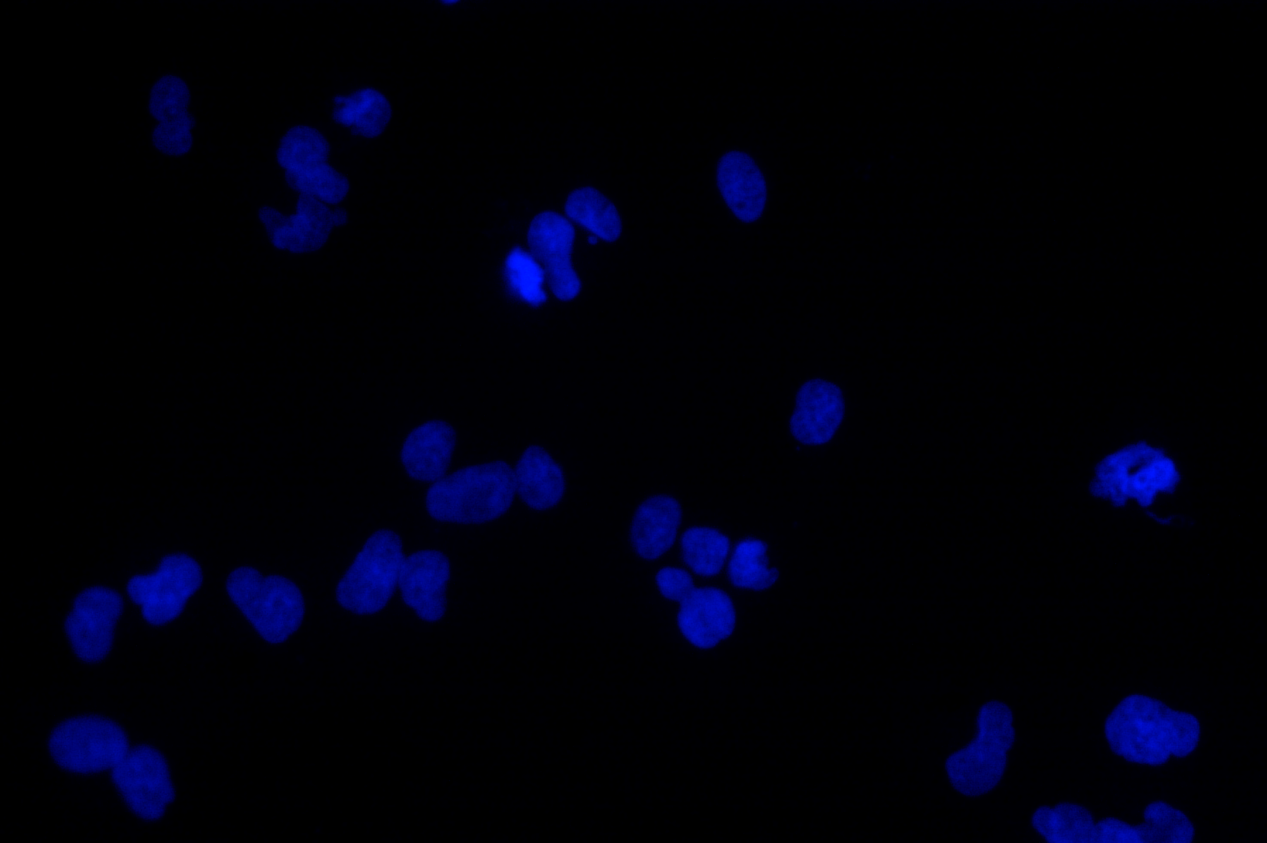


HepG2


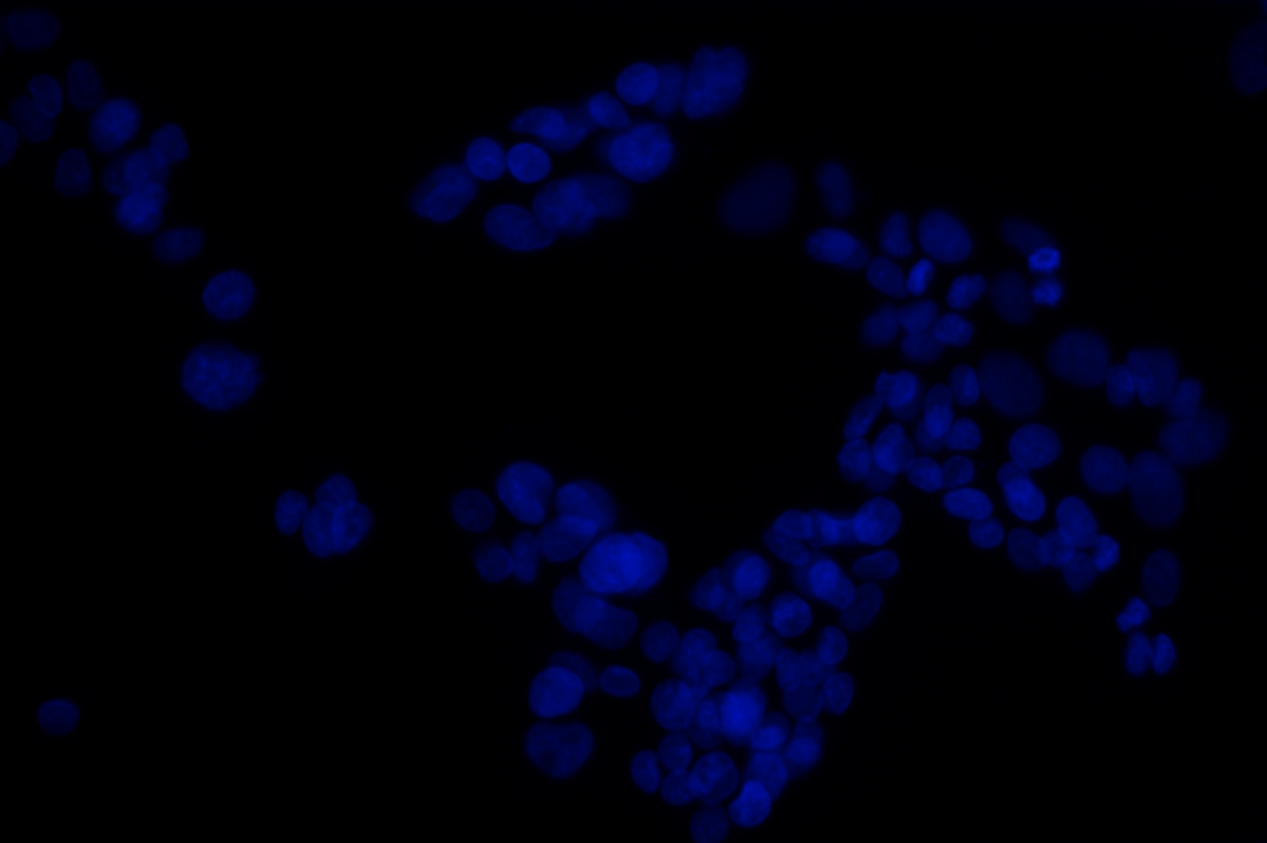


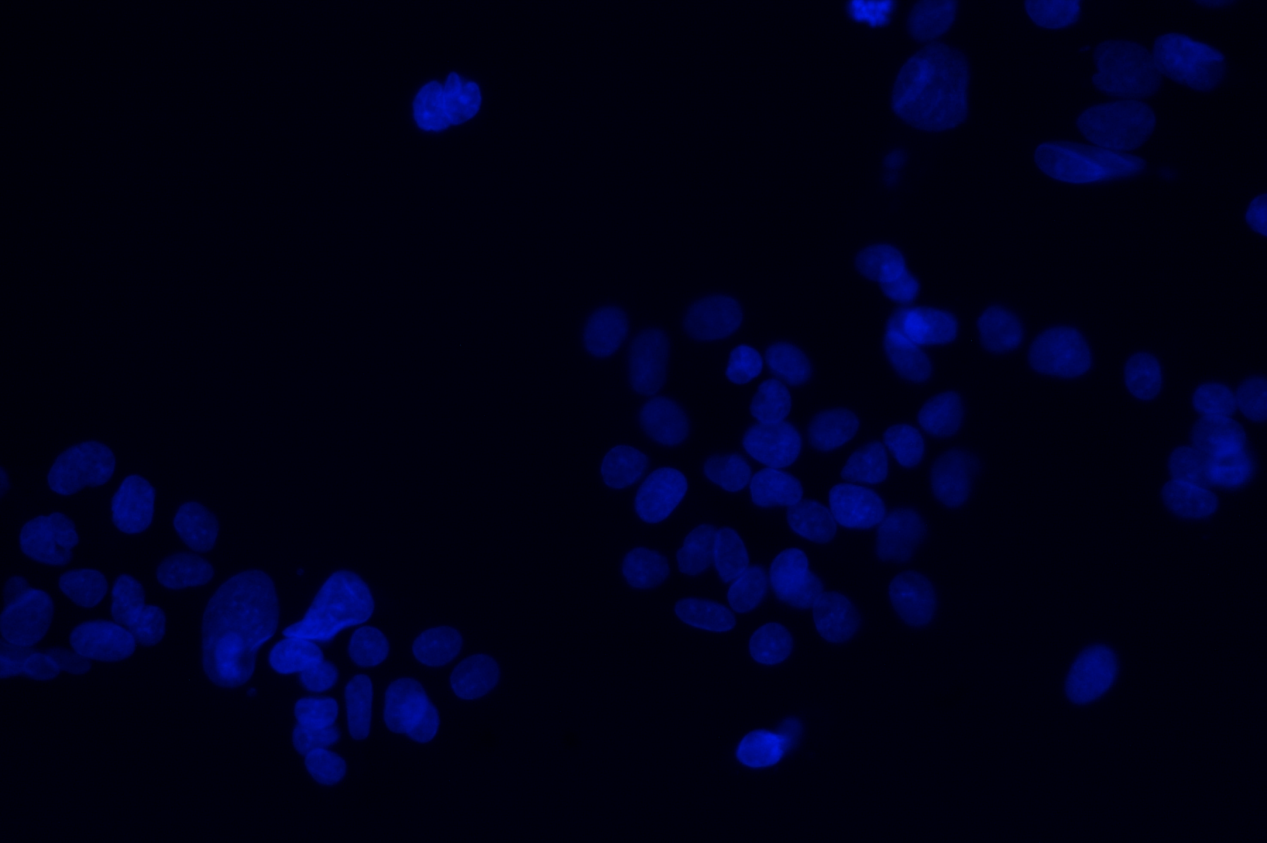


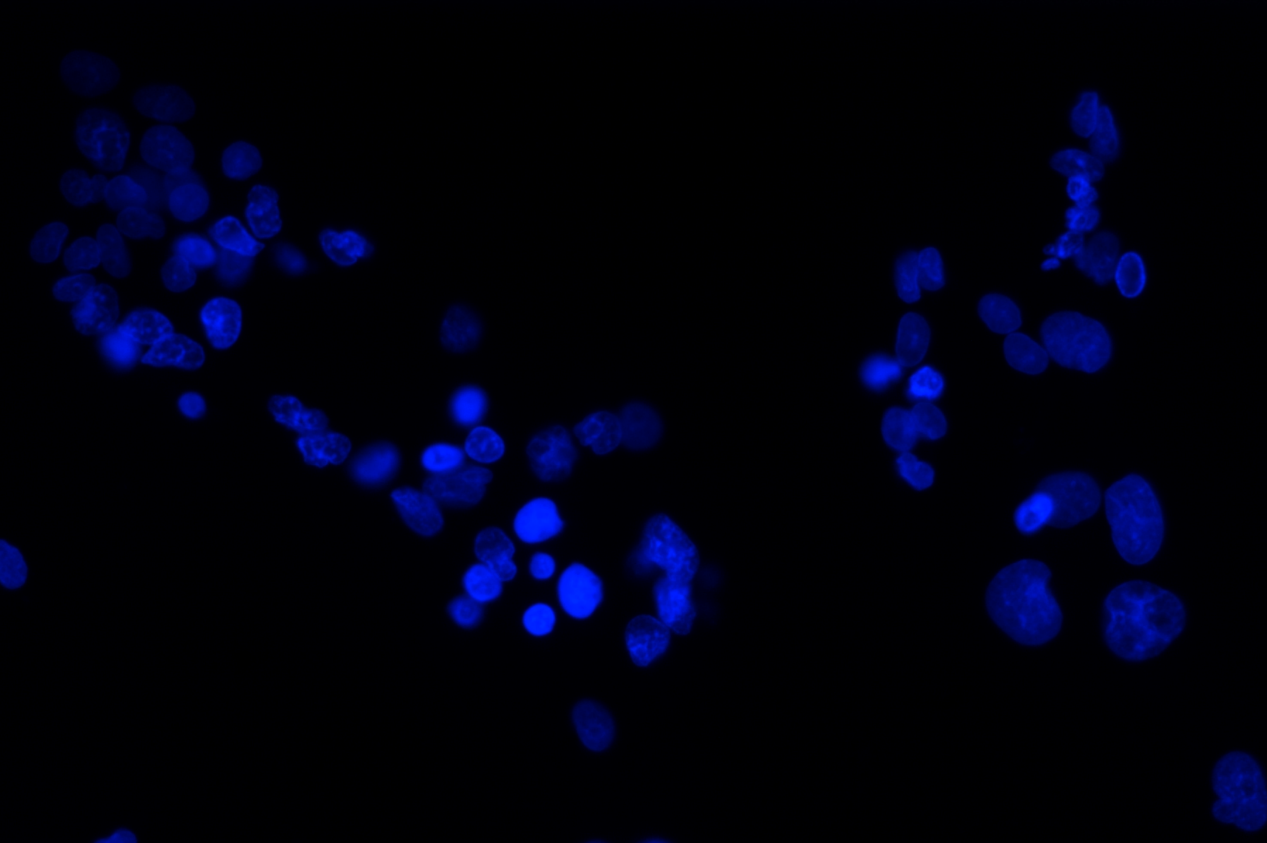


Cell apoptosis

Huh-7


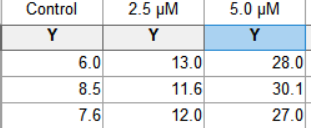


HepG2


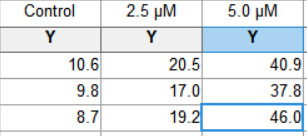


WB

Huh-7 repeat 1:

GAPDH


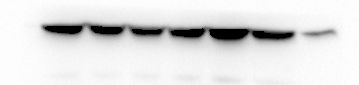


p-EGFR


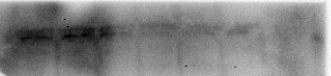


EGFR


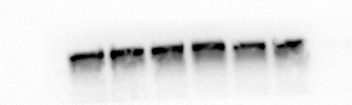


p-STAT3


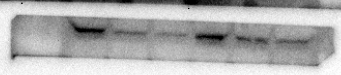


STAT3


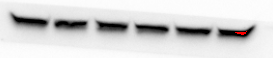


p-AKT


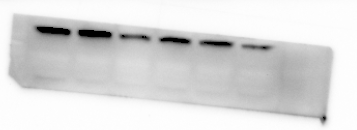


AKT


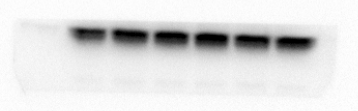


Bcl2


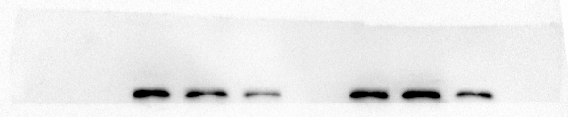


BAX


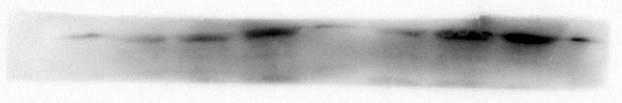


GAPDH


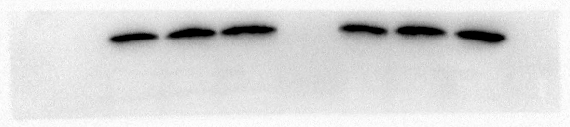


Huh-7 repeat 2, repeat 3

p-EGFR


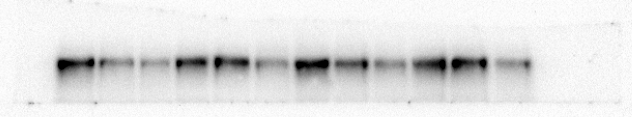


EGFR


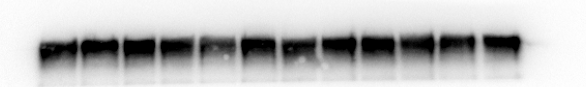


p-STAT3


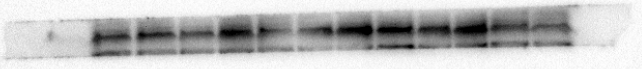


STAT3


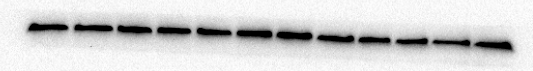


p-AKT


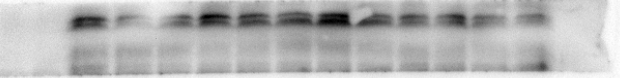


AKT


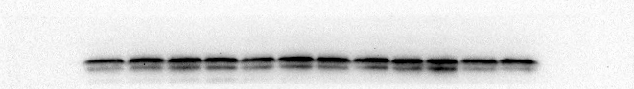


GAPDH


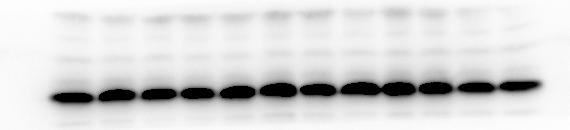


Bcl2


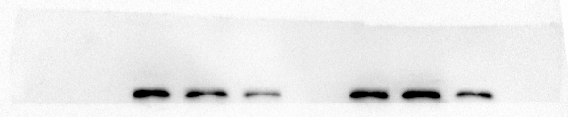


BAX


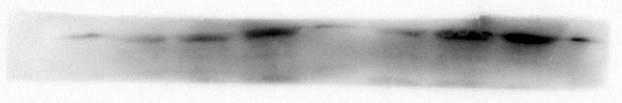


GAPDH


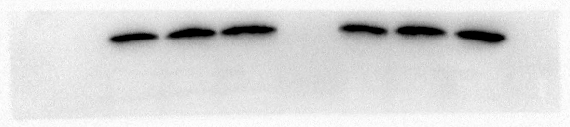


Repeat3

Bcl2


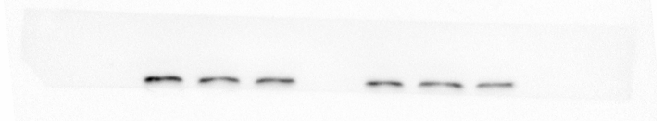


BAX


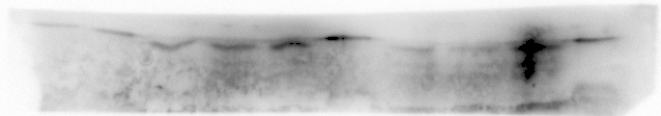


GAPDH


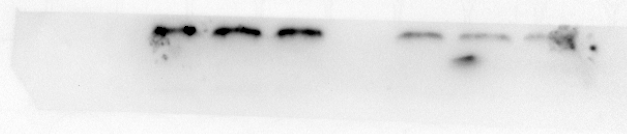


HepG2 WB

GAPDH


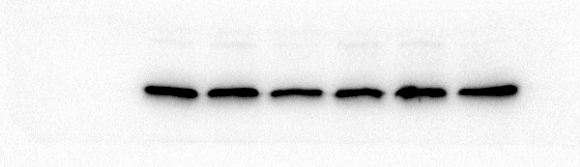


p-EGFR


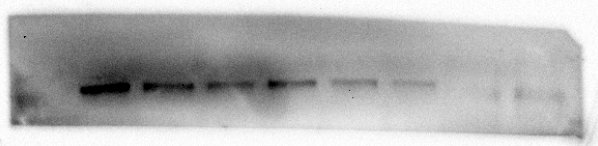


EGFR


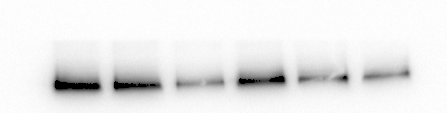


p-STAT3


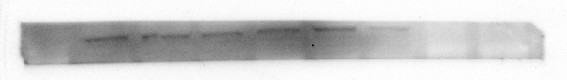


STAT3


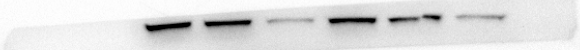


p-AKT


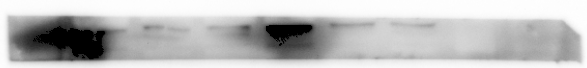


AKT


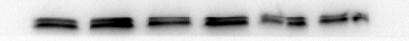


Bcl2


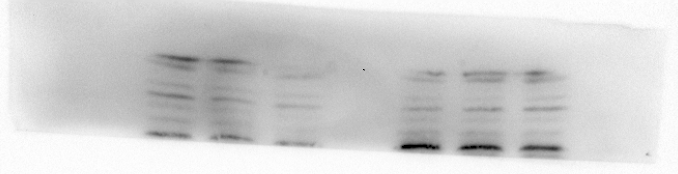


BAX


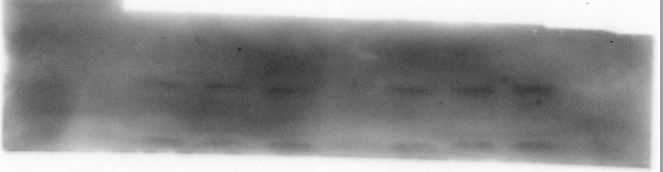


GAPDH


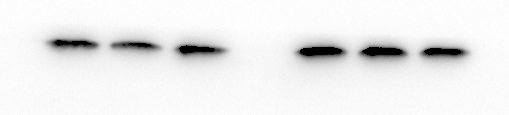


Repeat 2, 3

p-EGFR


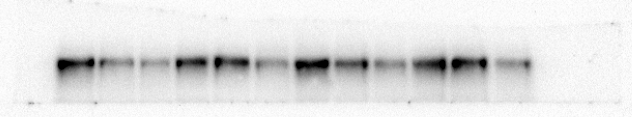


EGFR


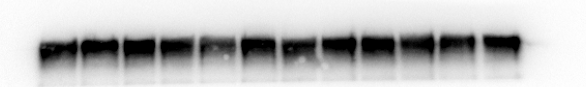


p-STAT3


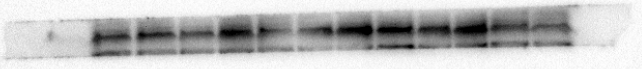


STAT3


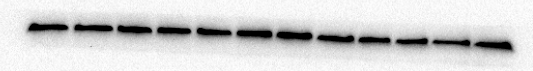


p-AKT


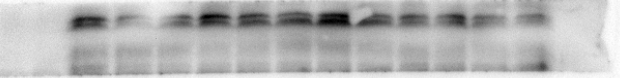


AKT


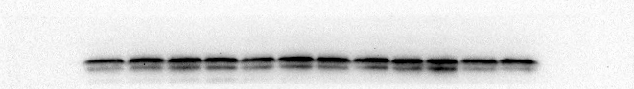


GAPDH


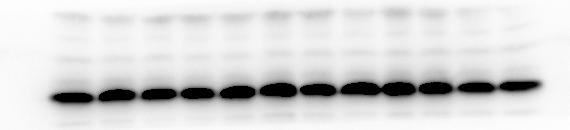


Repeat 2

Bcl2


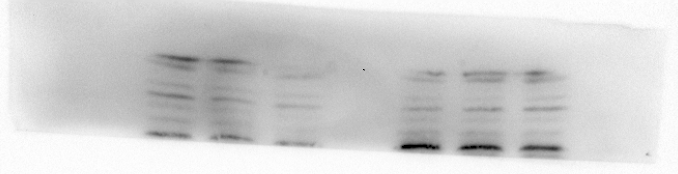


BAX


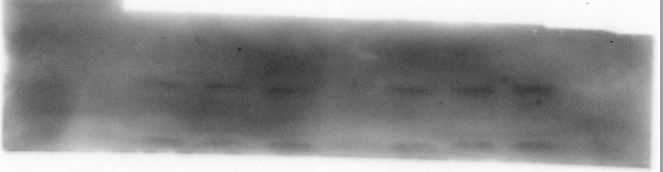


GAPDH


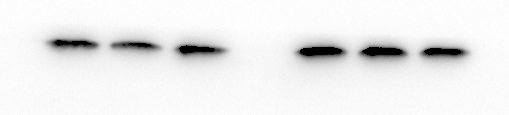


Repeat 3

Bcl2


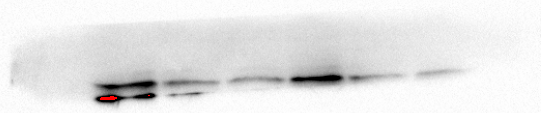


BAX


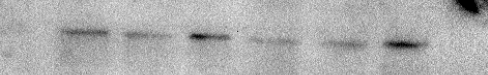


GAPDH


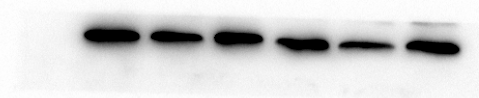

Supplement: supplement_information_3.docx [file supplement_information_3.docx]
