# Supplementary figures and images for: Dihydrotanshinone I inhibits hepatocellular carcinoma cells proliferation through DNA damage and EGFR pathway
Source: PeerJ journal article supplement (doi:10.7717/peerj.15022), 2023-03-13

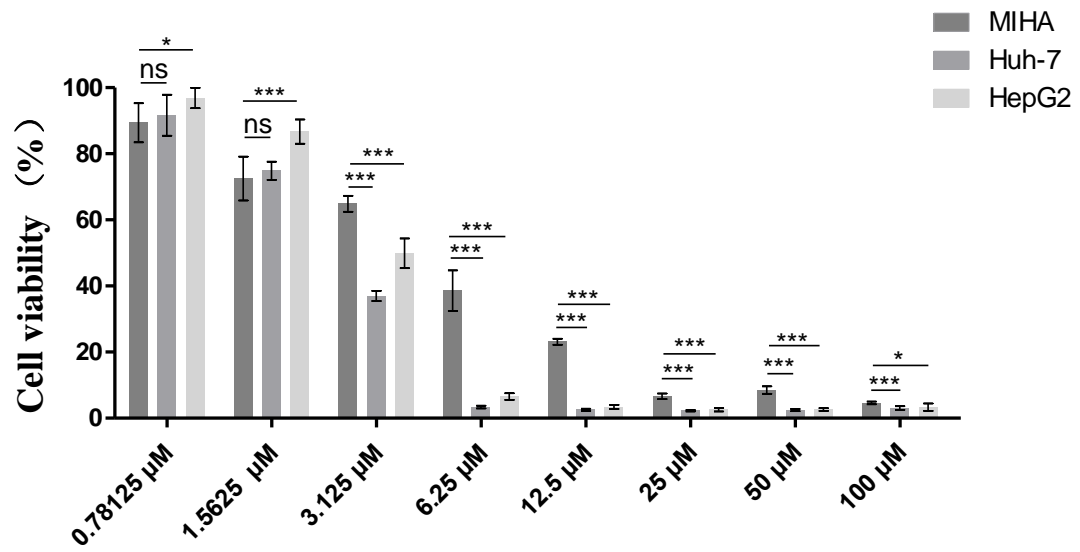

Figure S1. Analysis of cell viability of MIHA, Huh-7, and HepG2 cells by Dihydrotanshinone I.

Supplement: supporting_information_1.pdf [file supporting_information_1.pdf]

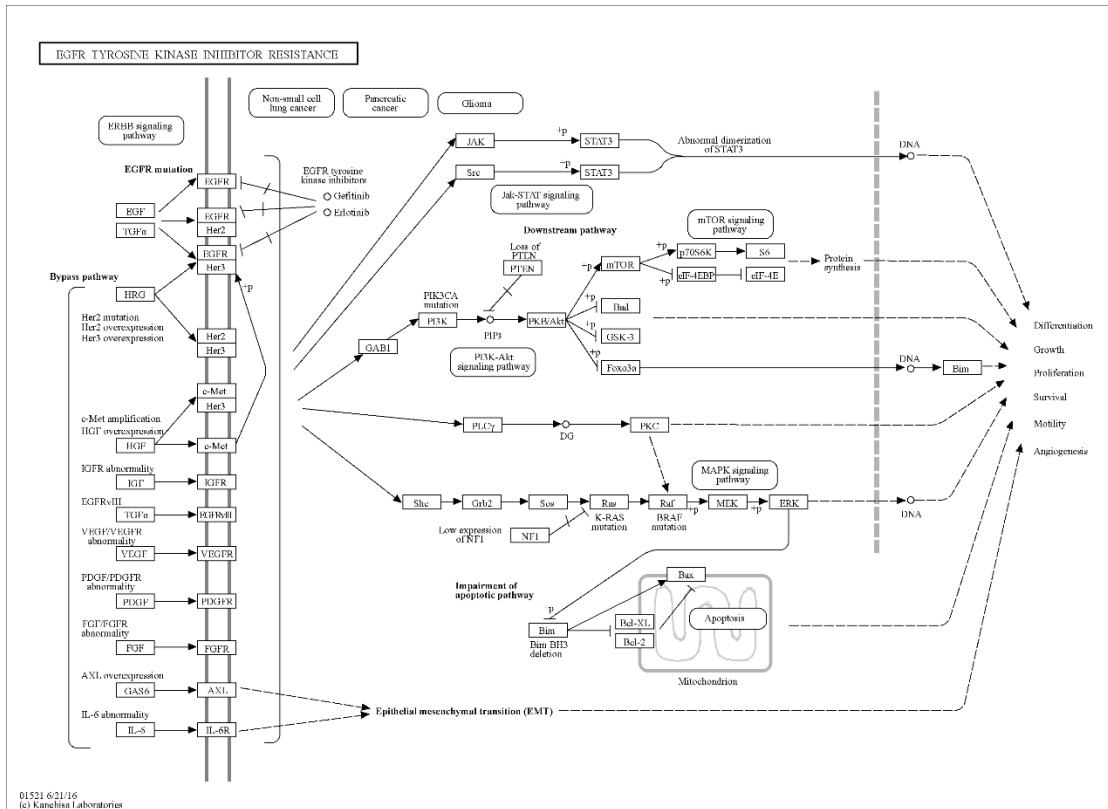

Figure S2. KEGG analysis regulated by Dihyrotanshinone I.

Supplement: supporting_information_2.pdf [file supporting_information_2.pdf]
